# Supplementary material for: 79/81Br nuclear quadrupole resonance spectroscopic characterization of halogen bonds in supramolecular assemblies
Source: Royal Society of Chemistry journal article supplement (doi:10.1039/c8sc01094c), 2018-01-01
Supplement: c8sc01094c1.pdf [file c8sc01094c1.pdf]

## **$^{79/81}\text{Br}$ Nuclear Quadrupole Resonance Spectroscopic Characterization of Halogen Bonds in Supramolecular Assemblies**

P. Cerreia Vioglio,<sup>a,†</sup> P. M. J. Szell,<sup>b</sup> M. R. Chierotti,<sup>a</sup> R. Gobetto<sup>a</sup> and D. L. Bryce<sup>\*,b</sup>

<sup>a</sup> Department of Chemistry and NIS Centre, University of Torino, Via Pietro Giuria 7, 10125 Torino, Italy.

<sup>b</sup> Department of Chemistry and Biomolecular Sciences & Centre for Catalysis Research and Innovation. University of Ottawa, 10 Marie Curie Private, Ottawa, Ontario K1N 6N5, Canada.

\* Tel: +1-613-562-5800 ext.2018; Fax: +1-613-562-5170. Email: [dbryce@uottawa.ca](mailto:dbryce@uottawa.ca)

† Present address: Aix-Marseille Université, CNRS, ICR (UMR 7273), 13397 Marseille cedex 20 (France).

## List of Figures

|                                                                                                                       |   |
|-----------------------------------------------------------------------------------------------------------------------|---|
| <b>Figure S1.</b> Experimental $^{13}\text{C}$ solid-state NMR spectrum of <b>2</b> (p-DBrTFB)(acridine) .....        | 3 |
| <b>Figure S2.</b> Experimental $^{13}\text{C}$ solid-state NMR spectrum of <b>3</b> (p-DBrTFB)(phenazine) .....       | 3 |
| <b>Figure S3.</b> Experimental $^{13}\text{C}$ solid-state NMR spectrum of <b>4</b> (p-DBrTFB)(bipy) .....            | 4 |
| <b>Figure S4.</b> Experimental $^{13}\text{C}$ solid-state NMR spectrum of <b>5</b> (p-DBrTFB)(dabco).....            | 4 |
| <b>Figure S5.</b> Experimental $^{13}\text{C}$ solid-state NMR spectrum of <b>6</b> (p-DBrTFB)(pip) .....             | 5 |
| <b>Figure S6.</b> Experimental powder X-ray diffraction of sample <b>1</b> .....                                      | 6 |
| <b>Figure S7.</b> Experimental powder X-ray diffraction of sample <b>2</b> with the calculated pattern overlaid.....  | 6 |
| <b>Figure S8.</b> Experimental powder X-ray diffraction of sample <b>3</b> with the calculated pattern overlaid.....  | 7 |
| <b>Figure S9.</b> Experimental powder X-ray diffraction of sample <b>4</b> with the calculated pattern overlaid.....  | 7 |
| <b>Figure S10.</b> Experimental powder X-ray diffraction of sample <b>5</b> with the calculated pattern overlaid..... | 8 |
| <b>Figure S11.</b> Experimental powder X-ray diffraction of sample <b>6</b> with the calculated pattern overlaid..... | 8 |

**$^1\text{H} \rightarrow ^{13}\text{C}$  Cross-Polarization Magic-Angle Spinning Solid-State NMR Spectra.  $B_0 = 9.4\text{ T}$ .**

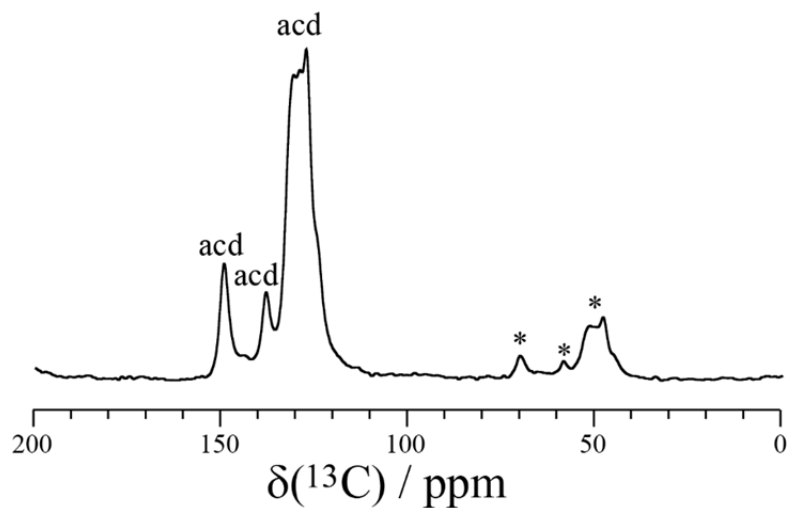

**Figure S1.** Experimental  $^{13}\text{C}$  solid-state NMR spectrum of **2** (*p*-DBrTFB)(acridine). The “acd” labels denote the resonances assigned to acridine ( $\delta(^{13}\text{C}) = 149.0 \pm 0.3\text{ ppm}$ ,  $137.6 \pm 0.3\text{ ppm}$ ,  $130.4 \pm 0.5\text{ ppm}$  to  $126.9 \pm 0.4\text{ ppm}$ , left to right). The asterisks denote spinning sidebands.

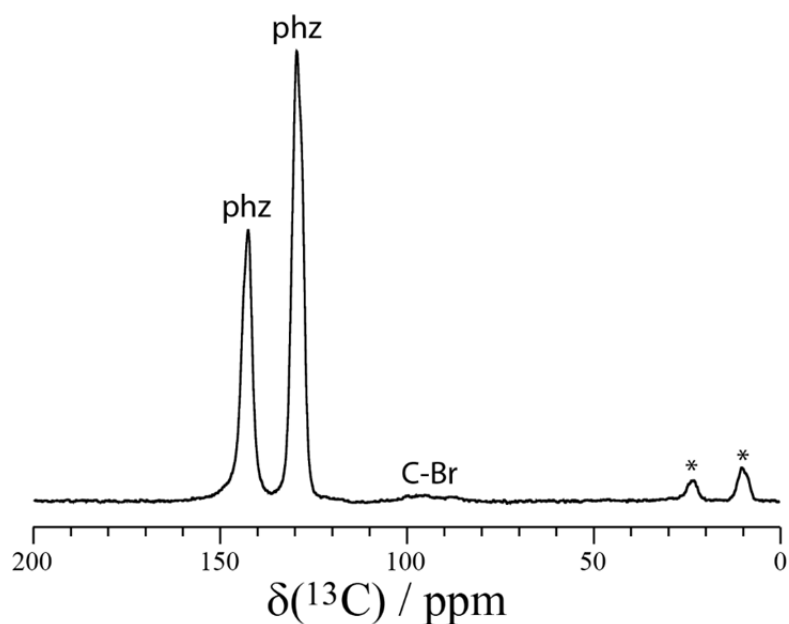

**Figure S2.** Experimental  $^{13}\text{C}$  solid-state NMR spectrum of **3** (*p*-DBrTFB)(phenazine). The “phz” labels denote the resonances assigned to phenazine ( $\delta(^{13}\text{C}) = 142.8 \pm 0.6\text{ ppm}$ ,  $129.8 \pm 0.7\text{ ppm}$ , left to right), whereas the “C-Br” label denotes the resonance assigned to the carbon covalently bonded to bromine ( $\delta(^{13}\text{C}) = 100.8 \pm 0.8\text{ ppm}$  to  $85.8 \pm 1.7\text{ ppm}$ ). The asterisks denote spinning sidebands.

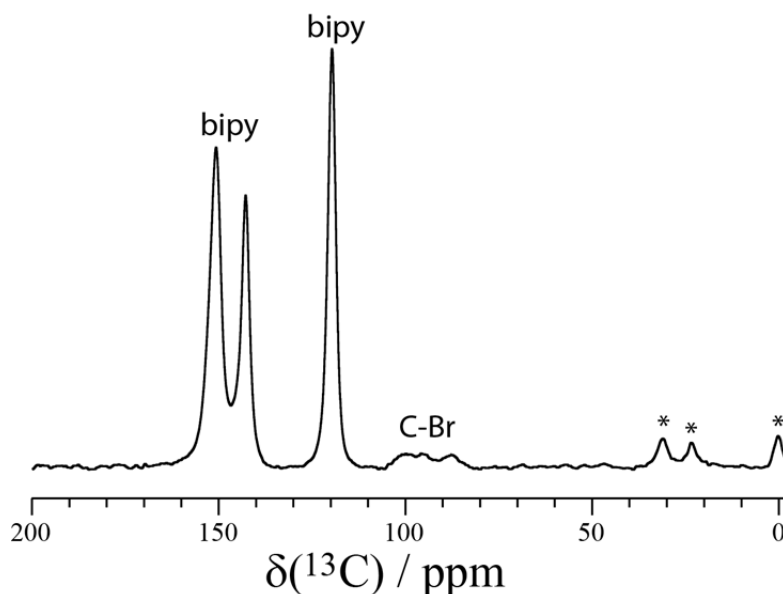

**Figure S3.** Experimental  $^{13}\text{C}$  solid-state NMR spectrum of **4** (*p*-DBrTFB)(bipy). The “bipy” labels denote the resonances assigned to phenazine ( $\delta(^{13}\text{C}) = 150.9 \pm 0.4$  ppm,  $142.9 \pm 0.4$  ppm,  $119.88 \pm 0.2$  ppm, left to right), whereas the “C-Br” label denotes the resonance assigned to the carbon covalently bonded to bromine ( $\delta(^{13}\text{C}) = 103.3 \pm 1.6$  ppm to  $85.3 \pm 1.3$  ppm). The asterisks denote spinning sidebands.

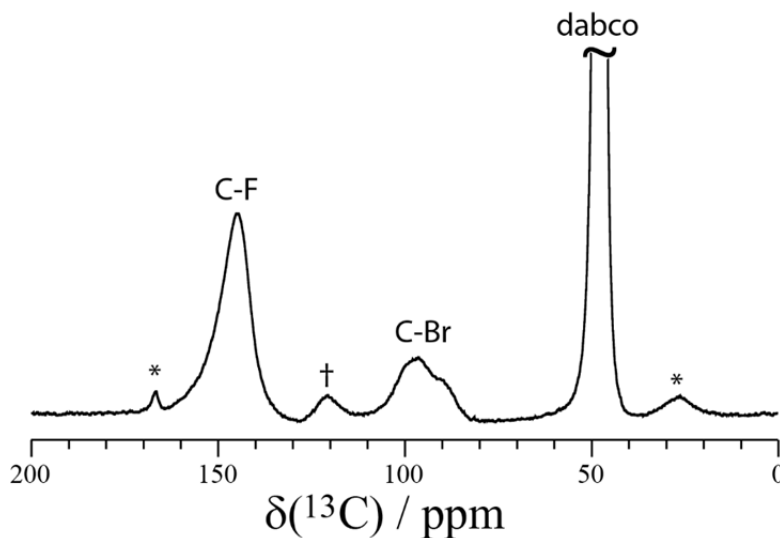

**Figure S4.** Experimental  $^{13}\text{C}$  solid-state NMR spectrum of **5** (*p*-DBrTFB)(dabco). The “dabco” label denotes the resonance assigned to dabco ( $\delta(^{13}\text{C}) = 47.6 \pm 0.1$  ppm), whereas the “C-Br” label denotes the resonance assigned to the carbon covalently bonded to bromine ( $\delta(^{13}\text{C}) = 102.6 \pm 1.3$  ppm to  $85.3 \pm 2.1$  ppm), and the “C-F” symbol denotes the carbon covalently bonded to fluorine ( $\delta(^{13}\text{C}) = 102.6 \pm 1.3$  ppm). The asterisks denote spinning sidebands. The dagger indicates a trace impurity.

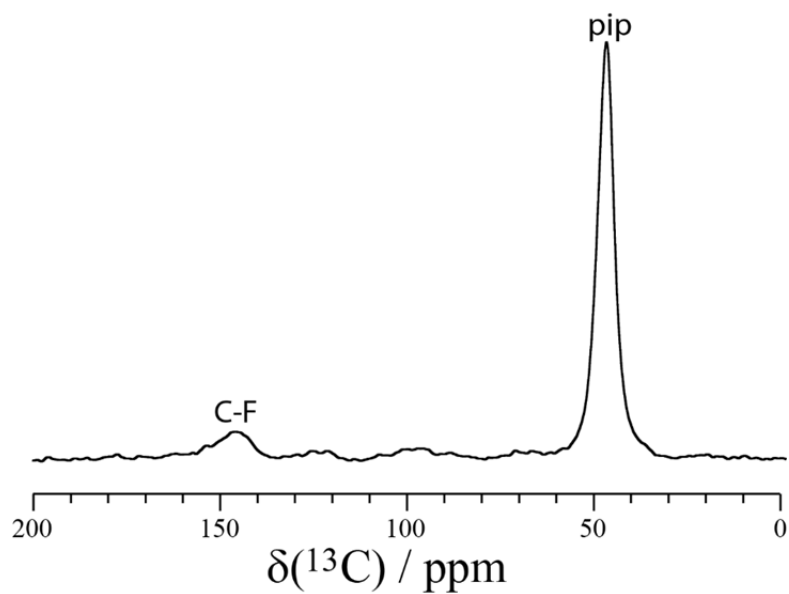

**Figure S5.** Experimental  $^{13}\text{C}$  solid-state NMR spectrum of **6** (*p*-DBrTFB)(pip). The “pip” label denotes the resonance assigned to piperazine ( $\delta(^{13}\text{C}) = 46.5 \pm 0.4$  ppm), whereas the “C-F” label denotes the resonance assigned the carbon covalently bonded to fluorine ( $\delta(^{13}\text{C}) = 145.9 \pm 2.3$  ppm). The asterisks denote spinning sidebands.

### Powder X-ray Diffraction

Powder X-ray diffractograms were acquired using a Rigaku Ultima IV Diffractometer operating at room temperature ( $298 \pm 1$  K) with a copper source and a diffracted beam monochromator.

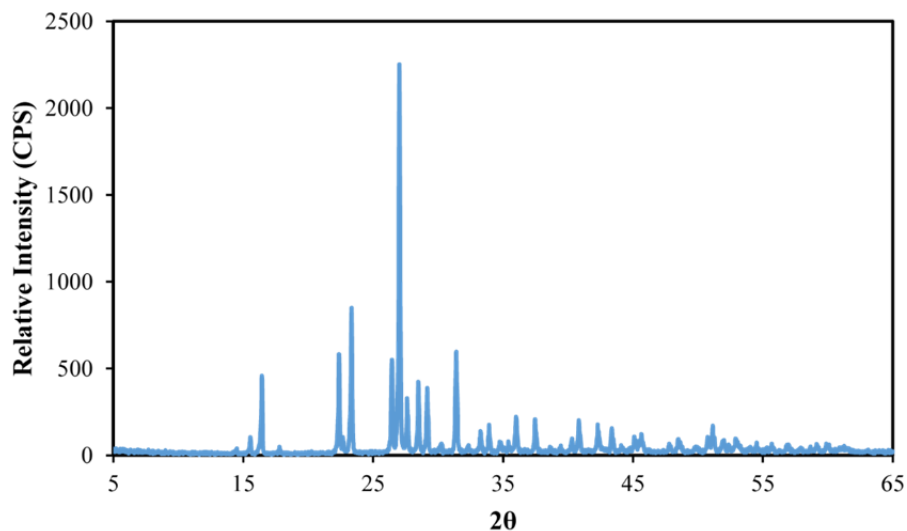

**Figure S6.** Experimental powder X-ray diffraction of sample 1.

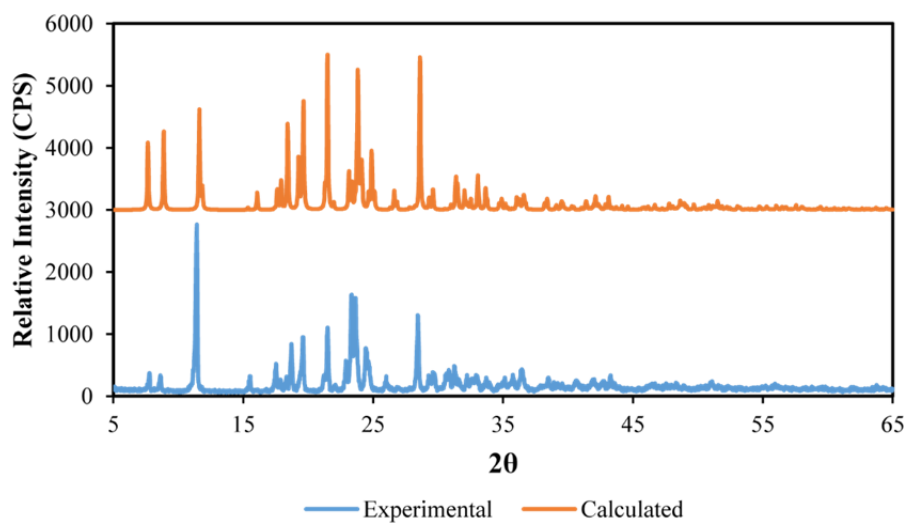

**Figure S7.** Experimental powder X-ray diffraction of sample 2 with the calculated pattern overlaid.

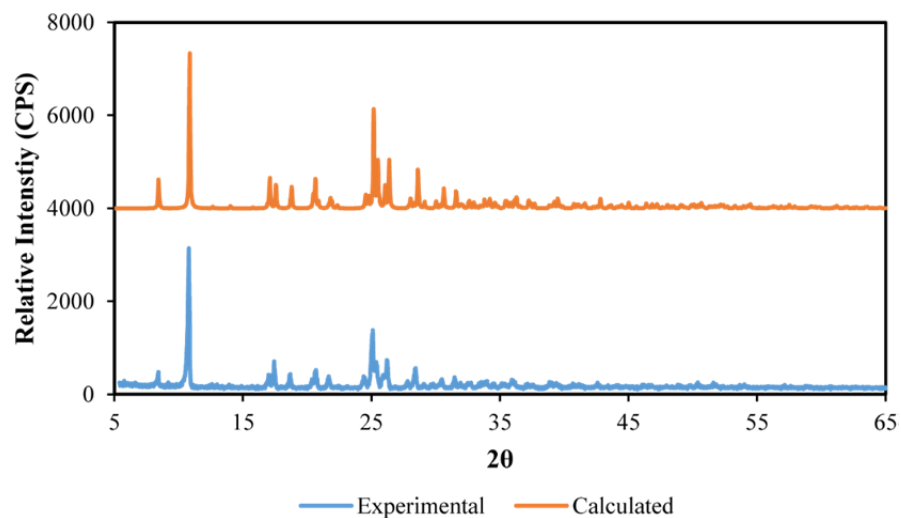

**Figure S8.** Experimental powder X-ray diffraction of sample **3** with the calculated pattern overlaid.

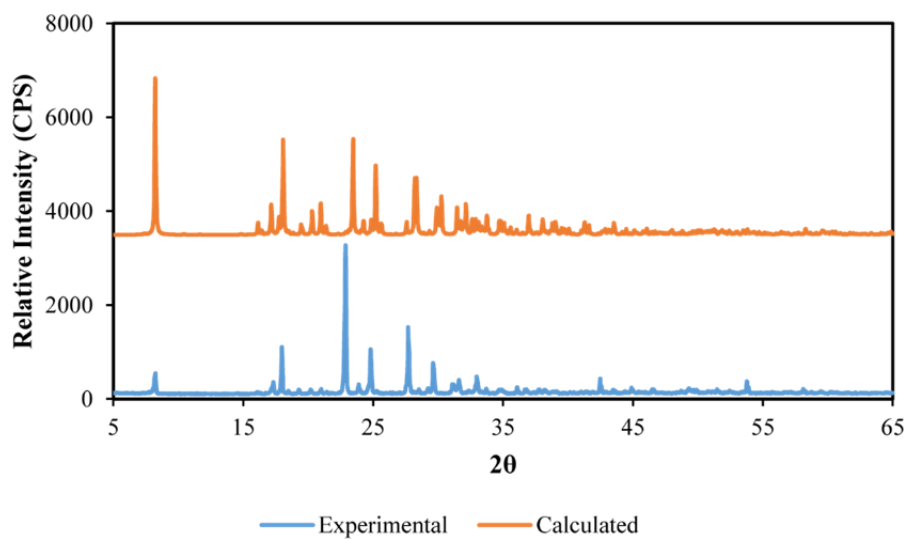

**Figure S9.** Experimental powder X-ray diffraction of sample **4** with the calculated pattern overlaid.

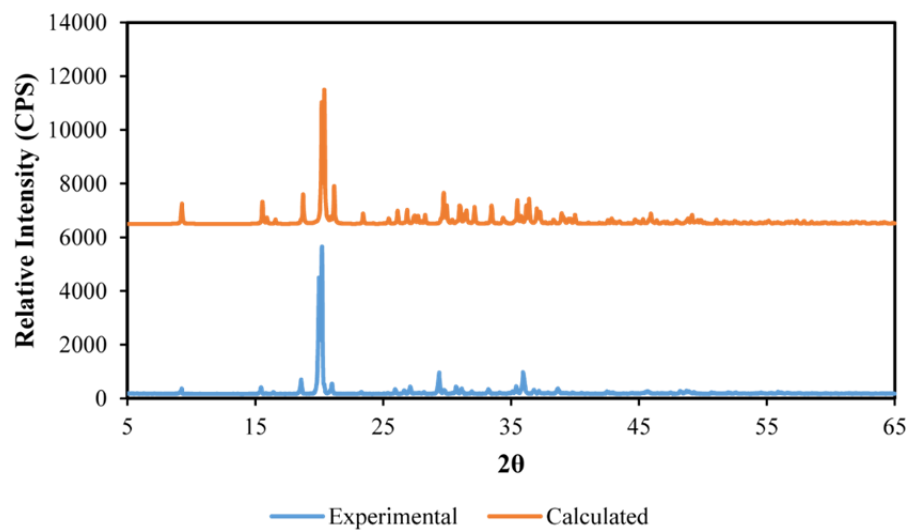

**Figure S10.** Experimental powder X-ray diffraction of sample **5** with the calculated pattern overlaid.

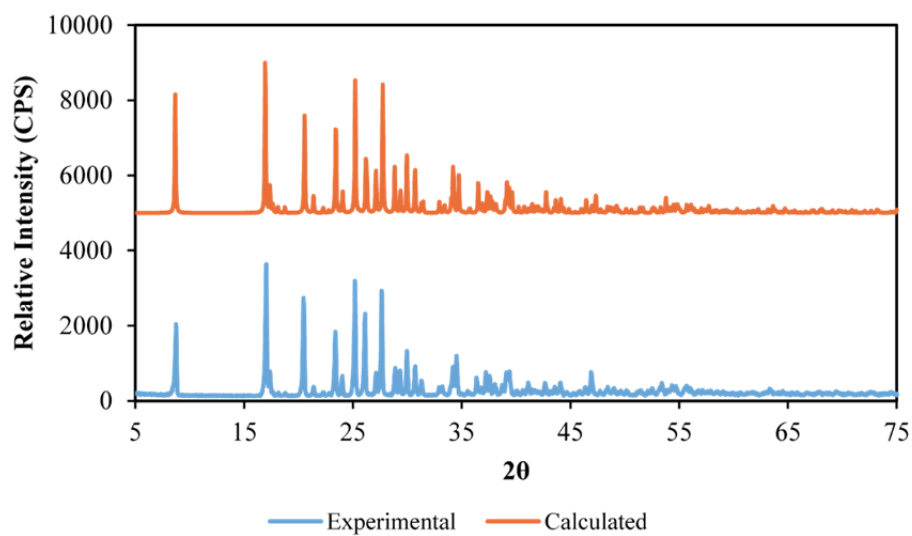

**Figure S11.** Experimental powder X-ray diffraction of sample **6** with the calculated pattern overlaid.
